# Supplementary material for: Towards retrieving the Promethean treasure: a first molecular assessment of the freshwater fish diversity of Georgia
Source: Biodivers Data J. 2020 Oct 23;8:e57862. doi: 10.3897/BDJ.8.e57862 (PMC7599205; doi:10.3897/BDJ.8.e57862)
Supplement: Supplementary material 1 — Epitashvili et al. Supplementary Table S1. [file bdj-08-e57862-s001.xlsx]

## Sheet: Supplementary Table S1
Epitashvili et al. Supplementary Table S1. Details on barcoded specimens from Georgia currently available in BOLD. Abbreviations used in the table: NA - information is not available; ISU - Ilia State University; FJF - Fischsammlung Jorg Freyhof; PC - Prior Collection i.e. before 2018-2019 bioblitz; RAS - Russian Academy of Sciences, Zoological Institute; ZFMK - Zoologisches Forschungsmuseum Alexa…
BOLD Sample ID	Identification	BIN	Collection Date	Institution Storing	Museum ID	River Drainage	Lat	Lon	Sampling Protocol	Collection Notes	ZFMK DNA Storage ID
WH02H10	Acanthobrama microlepis	BOLD:ADL5967	2006-08-04	ZFMK	ZFMK-ICH-TIS-NB164	Kura	41.355	45.083	hand net	PC	-
WH02H8	Acanthobrama microlepis	BOLD:ADL5967	2006-08-04	ZFMK	ZFMK-ICH-TIS-NB164	Kura	41.355	45.083	hand net	PC	-
KX189530	Alburnoides eichwaldii	BOLD:ADK3170	2015-09-30	GenBank	NCBI:txid1201212	Kura	NA	NA	hand net	PC	-
KX189532	Alburnoides eichwaldii	BOLD:ADK3170	2015-09-30	GenBank	NCBI:txid1201212	Kura	NA	NA	hand net	PC	-
KX189534	Alburnoides eichwaldii	BOLD:ADK3170	2015-09-30	GenBank	NCBI:txid1201212	Kura	NA	NA	hand net	PC	-
8005838	Alburnoides eichwaldii	BOLD:ADK3170	08-Jul-2019	ZFMK	ZFMK-ICH-106216	Kura	41.867	45.81	electro fishing and frame net	Georgia BioBlitz 2019	ZFMK-DNA-FD05085717
8007867	Alburnoides eichwaldii	BOLD:ADK3170	05-Jul-2019	ZFMK	ZFMK-ICH-106168	Kura	42.234	44.845	electro fishing	Georgia BioBlitz 2019	ZFMK-DNA-FD05085417
8007868	Alburnoides eichwaldii	BOLD:ADK3170	05-Jul-2019	ZFMK	ZFMK-ICH-106169	Kura	42.234	44.845	electro fishing	Georgia BioBlitz 2019	ZFMK-DNA-FD05085425
8007869	Alburnoides eichwaldii	BOLD:ADK3170	05-Jul-2019	ZFMK	ZFMK-ICH-106170	Kura	42.234	44.845	electro fishing	Georgia BioBlitz 2019	ZFMK-DNA-FD05085433
Ex24C12	Alburnoides eichwaldii	BOLD:ADK3170	2006-08-02	ZFMK	ZFMK-ICH-TIS-NB137 & ZFMK ICH -103210-103241	Kura	41.578	45.613	hand net	PC	ZFMK-DNA-0100416195
Ex24D1	Alburnoides eichwaldii	BOLD:ADK3170	2006-08-02	ZFMK	ZFMK-ICH-TIS-NB137 & ZFMK ICH -103210-103241	Kura	41.578	45.613	hand net	PC	ZFMK-DNA-0100416183
Ex24D4	Alburnoides eichwaldii	BOLD:ADK3170	2006-08-02	ZFMK	ZFMK-ICH-TIS-NB143 & ZFMK ICH -103352-103353	Kura	41.586	45.599	hand net	PC	ZFMK-DNA-0100416186
Ex24F8	Alburnoides eichwaldii	BOLD:ADK3170	2006-08-05	ZFMK	ZFMK-ICH-TIS-NB172 & ZFMK ICH -103565-103624	Kura	41.994	44.76	hand net	PC	ZFMK-DNA-0100416166
WH02H4	Alburnoides eichwaldii	BOLD:ADK3170	2006-08-02	ZFMK	ZFMK-ICH-TIS-NB140	Kura	41.578	45.613	hand net	PC	-
KX189557	Alburnoides fasciatus	BOLD:ADJ9477	2015-08-08	GenBank	NCBI:txid870488	Bzyb	NA	NA	hand net	PC	-
KX189558	Alburnoides fasciatus	BOLD:ADJ9477	2015-08-08	GenBank	NCBI:txid870488	Bzyb	NA	NA	hand net	PC	-
KX189559	Alburnoides fasciatus	BOLD:ADJ9477	2015-08-08	GenBank	NCBI:txid870488	Bzyb	NA	NA	hand net	PC	-
KX189560	Alburnoides fasciatus	BOLD:ADJ9477	2015-08-08	GenBank	NCBI:txid870488	Bzyb	NA	NA	hand net	PC	-
KX189561	Alburnoides fasciatus	BOLD:ADJ9477	2015-08-08	GenBank	NCBI:txid870488	Bzyb	NA	NA	hand net	PC	-
KX189562	Alburnoides fasciatus	BOLD:ADJ9477	2015-08-08	GenBank	NCBI:txid870488	Bzyb	NA	NA	hand net	PC	-
KX189563	Alburnoides fasciatus	BOLD:ADJ9477	2015-08-09	GenBank	NCBI:txid870488	Kodor	NA	NA	hand net	PC	-
KX189564	Alburnoides fasciatus	BOLD:ADJ9477	2015-08-09	GenBank	NCBI:txid870488	Kodor	NA	NA	hand net	PC	-
KX189565	Alburnoides fasciatus	BOLD:ADJ9477	2015-08-09	GenBank	NCBI:txid870488	Kodor	NA	NA	hand net	PC	-
KX189566	Alburnoides fasciatus	BOLD:ADJ9477	2015-08-09	GenBank	NCBI:txid870488	Kodor	NA	NA	hand net	PC	-
KX189567	Alburnoides fasciatus	BOLD:ADJ9477	2015-08-09	GenBank	NCBI:txid870488	Kodor	NA	NA	hand net	PC	-
KX189568	Alburnoides fasciatus	BOLD:ADJ9477	2015-08-08	GenBank	NCBI:txid870488	Bzyb	NA	NA	hand net	PC	-
KX189569	Alburnoides fasciatus	BOLD:ADJ9477	2015-08-09	GenBank	NCBI:txid870488	Kodor	NA	NA	hand net	PC	-
KX189570	Alburnoides fasciatus	BOLD:ADJ9477	2015-10-02	GenBank	NCBI:txid870488	Chorokh	NA	NA	hand net	PC	-
KX189572	Alburnoides fasciatus	BOLD:ADJ9477	2015-10-02	GenBank	NCBI:txid870488	Chorokh	NA	NA	hand net	PC	-
Ex24G5	Alburnoides fasciatus	BOLD:ADJ9477	2006-08-06	ZFMK	ZFMK-ICH-TIS-NB183 & ZFMK ICH -104022-104023	Rioni	42.097	43.39	hand net	PC	ZFMK-DNA-0100416382
Ex24G6	Alburnoides fasciatus	BOLD:ADJ9477	2006-08-06	ZFMK	ZFMK-ICH-TIS-NB183 & ZFMK ICH -104022-104023	Rioni	42.097	43.39	hand net	PC	ZFMK-DNA-0100416405
Ex71C9	Alburnoides fasciatus	BOLD:ADJ9477	2007-08-04	ZFMK	ZFMK-ICH-TIS-K16-1	Mchishta	43.215	40.515	hand net	PC	-
ZFMK-TIS-36015	Alburnoides fasciatus	BOLD:ADJ9477	21-Jul-2018	ZFMK	ZFMK-ICH-106083	Kintrishi	41.8033	41.7778	electro fishing	Georgia BioBlitz 2018	ZFMK-DNA-FC17902803
ZFMK-TIS-36016	Alburnoides fasciatus	BOLD:ADJ9477	21-Jul-2018	ZFMK	ZFMK-ICH-106084	Kintrishi	41.8033	41.7778	electro fishing	Georgia BioBlitz 2018	ZFMK-DNA-FC17902811
ZFMK-TIS-36026	Alburnoides fasciatus	BOLD:ADJ9477	21-Jul-2018	ZFMK	ZFMK-ICH-106094	Kintrishi	41.7889	41.9603	electro fishing	Georgia BioBlitz 2018	ZFMK-DNA-FC17902796
ZFMK-TIS-36027	Alburnoides fasciatus	BOLD:ADJ9477	21-Jul-2018	ZFMK	ZFMK-ICH-106095	Kintrishi	41.7889	41.9603	electro fishing	Georgia BioBlitz 2018	ZFMK-DNA-FC17902804
ZFMK-TIS-36198	Alburnoides fasciatus	BOLD:ADJ9477	19-Jul-2018	ZFMK	ZFMK-ICH-106266	Pichori	42.085	42.0246	hand net	Georgia BioBlitz 2018	ZFMK-DNA-FC17902808
ZFMK-TIS-36199	Alburnoides fasciatus	BOLD:ADJ9477	19-Jul-2018	ZFMK	ZFMK-ICH-106267	Pichori	42.085	42.0246	hand net	Georgia BioBlitz 2018	ZFMK-DNA-FC17902816
Ex25B5	Alburnus derjugini	BOLD:AAB6908	2006-08-09	ZFMK	ZFMK-ICH-TIS-NB204	Natanebi	41.933	41.836	hand net	PC	-
Ex25B6	Alburnus derjugini	BOLD:AAB6908	2006-08-09	ZFMK	ZFMK-ICH-TIS-NB205	Natanebi	41.933	41.836	hand net	PC	-
Ex72C10	Alburnus derjugini	BOLD:AAB6908	2007-07-30	ZFMK	ZFMK-ICH-TIS-K3-1	Mokva	42.767	41.466	hand net	PC	-
Ex72C9	Alburnus derjugini	BOLD:AAB6908	2007-07-29	ZFMK	ZFMK-ICH-TIS-K2-6	Kodor	42.797	41.191	hand net	PC	-
Ex72D4	Alburnus derjugini	BOLD:AAB6908	2007-07-31	ZFMK	ZFMK-ICH-TIS-K7-5	Galidzga	42.688	41.512	hand net	PC	-
ZFMK-TIS-36055	Alburnus derjugini	BOLD:AAB6908	22-Jul-2018	ZFMK	ZFMK-ICH-106123	Kintrishi	41.8016	41.8095	electro fishing	Georgia BioBlitz 2018	ZFMK-DNA-FC17902829
ZFMK-TIS-36057	Alburnus derjugini	BOLD:AAB6908	22-Jul-2018	ZFMK	ZFMK-ICH-106125	Kintrishi	41.8016	41.8095	electro fishing	Georgia BioBlitz 2018	ZFMK-DNA-FC17902845
ZFMK-TIS-36165	Alburnus derjugini	BOLD:AAB6908	22-Jul-2018	ZFMK	ZFMK-ICH-106233	Kintrishi	41.8033	41.7778	electro fishing	Georgia BioBlitz 2018	ZFMK-DNA-FC17902854
ZFMK-TIS-36166	Alburnus derjugini	-	22-Jul-2018	ZFMK	ZFMK-ICH-106234	Kintrishi	41.8033	41.7778	electro fishing	Georgia BioBlitz 2018	ZFMK-DNA-FC17902862
ZFMK-TIS-36167	Alburnus derjugini	BOLD:AAB6908	22-Jul-2018	ZFMK	ZFMK-ICH-106235	Kintrishi	41.8033	41.7778	electro fishing	Georgia BioBlitz 2018	ZFMK-DNA-FC17902870
8005835	Alburnus filippii	BOLD:AAB6906	08-Jul-2019	ZFMK	ZFMK-ICH-106213	Kura	41.867	45.81	electro fishing and frame net	Georgia BioBlitz 2019	ZFMK-DNA-FD05085661
8007864	Alburnus filippii	BOLD:AAB6906	05-Jul-2019	ZFMK	ZFMK-ICH-106165	Kura	42.234	44.845	electro fishing	Georgia BioBlitz 2019	ZFMK-DNA-FD05085393
8007865	Alburnus filippii	BOLD:AAB6906	05-Jul-2019	ZFMK	ZFMK-ICH-106166	Kura	42.234	44.845	electro fishing	Georgia BioBlitz 2019	ZFMK-DNA-FD05085401
8007866	Alburnus filippii	BOLD:AAB6906	05-Jul-2019	ZFMK	ZFMK-ICH-106167	Kura	42.234	44.845	electro fishing	Georgia BioBlitz 2019	ZFMK-DNA-FD05085409
Ex42B10	Barbus cyri	BOLD:AAD1959	2006-08-03	FSJF	FSJF-DNA-1777	Kura	41.767	45.924	hand net	PC	-
Ex42B11	Barbus cyri	BOLD:AAD1959	2006-08-03	FSJF	FSJF-DNA-1777	Kura	41.767	45.924	hand net	PC	-
Ex42B9	Barbus cyri	BOLD:AAD1959	2006-08-03	FSJF	FSJF-DNA-1777	Kura	41.767	45.924	hand net	PC	-
8007790	Barbus cyri	-	30-Jun-2019	ISU	HIDBl16	Kura	41.876	44.3144	electro fishing	PC	ZFMK-DNA-FD05085371
8007791	Barbus cyri	-	30-Jun-2019	ISU	HIDBl16	Kura	41.876	44.3144	electro fishing	PC	ZFMK-DNA-FD05085379
8007793	Barbus cyri	-	30-Jun-2019	ISU	HIDBl16	Kura	41.876	44.3144	electro fishing	PC	ZFMK-DNA-FD05085395
8007809	Barbus cyri	BOLD:AAD1959	22-May-2019	ISU	HIDBl21	Kura	41.6016	46.0138	electro fishing	PC	ZFMK-DNA-FD05085428
8007810	Barbus cyri	BOLD:AAD1959	22-May-2019	ISU	HIDBl21	Kura	41.6016	46.0138	electro fishing	PC	ZFMK-DNA-FD05085436
8007811	Barbus cyri	BOLD:AAD1959	22-May-2019	ISU	HIDBl21	Kura	41.6016	46.0138	electro fishing	PC	ZFMK-DNA-FD05085444
Ex24E2	Barbus cyri	BOLD:AAD1959	2006-08-03	ZFMK	ZFMK-ICH-TIS-NB159	Kura	41.767	45.924	hand net	PC	ZFMK-DNA-0100416181
Ex24E4	Barbus cyri	BOLD:AAD1959	2006-08-03	ZFMK	ZFMK-ICH-TIS-NB160	Kura	41.767	45.924	hand net	PC	ZFMK-DNA-0100416179
Ex24E5	Barbus cyri	BOLD:AAD1959	2006-08-03	ZFMK	ZFMK-ICH-TIS-NB160	Kura	41.767	45.924	hand net	PC	ZFMK-DNA-0100416178
8007795	Barbus rionicus	BOLD:AAD1959	01-Jun-2019	ISU	HIDBr12	Chorokh	41.5821	41.9679	electro fishing	PC	ZFMK-DNA-FD05085411
8007796	Barbus rionicus	BOLD:AAD1959	01-Jun-2019	ISU	HIDBr12	Chorokh	41.5821	41.9679	electro fishing	PC	ZFMK-DNA-FD05085419
8007797	Barbus rionicus	BOLD:AAD1959	01-Jun-2019	ISU	HIDBr12	Chorokh	41.5821	41.9679	electro fishing	PC	ZFMK-DNA-FD05085427
8007798	Barbus rionicus	BOLD:AAD1959	01-Jun-2019	ISU	HIDBr12	Chorokh	41.5821	41.9679	electro fishing	PC	ZFMK-DNA-FD05085435
8007799	Barbus rionicus	BOLD:AAD1959	01-Jun-2019	ISU	HIDBr12	Chorokh	41.5821	41.9679	electro fishing	PC	ZFMK-DNA-FD05085443
8007800	Barbus rionicus	BOLD:AAD1959	01-Jun-2019	ISU	HIDBr12	Chorokh	41.5821	41.9679	electro fishing	PC	ZFMK-DNA-FD05085451
Ex24G10	Barbus rionicus	BOLD:AAD1959	2006-08-07	ZFMK	ZFMK-ICH-TIS-NB185 & ZFMK ICH -103084-103085	Rioni	42.169	42.431	hand net	PC	ZFMK-DNA-0100416149
Ex36B11	Barbus rionicus	BOLD:AAD1959	2012	ZFMK	ZFMK-ICH-TIS-K4-5	Galidzga	42.708	41.485	hand net	PC	ZFMK-DNA-0100416697
Ex36B12	Barbus rionicus	BOLD:AAD1959	2012	ZFMK	ZFMK-ICH-TIS-K11-1	Kelasuri	43.007	41.126	hand net	PC	ZFMK-DNA-0100416698
Ex36C1	Barbus rionicus	BOLD:AAD1959	2012	ZFMK	ZFMK-ICH-TIS-K11-2	Kelasuri	43.007	41.126	hand net	PC	ZFMK-DNA-0100416686
Ex71A3	Barbus rionicus	BOLD:AAD1959	2006-08-06	ZFMK	ZFMK-ICH-TIS-C15-1	Rioni	42.097	43.39	hand net	PC	-
Ex71A4	Barbus rionicus	BOLD:AAD1959	2006-08-06	ZFMK	ZFMK-ICH-TIS-C15-1	Rioni	42.097	43.39	hand net	PC	-
Ex71A5	Barbus rionicus	BOLD:AAD1959	2006-08-06	ZFMK	ZFMK-ICH-TIS-C15-1	Rioni	42.097	43.39	hand net	PC	-
Ex72H10	Barbus rionicus	BOLD:AAD1959	2007-08-02	ZFMK	ZFMK-ICH-TIS-K11-1	Kelasuri	43.007	41.126	hand net	PC	-
Ex72H11	Barbus rionicus	BOLD:AAD1959	2007-07-29	ZFMK	ZFMK-ICH-TIS-K4-5	Galidzga	42.708	41.485	hand net	PC	-
WH03A6	Barbus rionicus	BOLD:AAD1959	2006-08-07	ZFMK	ZFMK-ICH-TIS-NB185 & ZFMK ICH -103084-103085	Rioni	42.169	42.431	hand net	PC	-
WH03A7	Barbus rionicus	BOLD:AAD1959	2006-08-07	ZFMK	ZFMK-ICH-TIS-NB185 & ZFMK ICH -103084-103085	Rioni	42.169	42.431	hand net	PC	-
WH03A8	Barbus rionicus	BOLD:AAD1959	2006-08-07	ZFMK	ZFMK-ICH-TIS-NB185 & ZFMK ICH -103084-103085	Rioni	42.169	42.431	hand net	PC	-
ZFMK-TIS-36034	Barbus rionicus	-	21-Jul-2018	ZFMK	ZFMK-ICH-106102	Kintrishi	41.7991	41.848	electro fishing	Georgia BioBlitz 2018	ZFMK-DNA-FC17902828
ZFMK-TIS-36035	Barbus rionicus	BOLD:AAD1959	21-Jul-2018	ZFMK	ZFMK-ICH-106103	Kintrishi	41.7991	41.848	electro fishing	Georgia BioBlitz 2018	ZFMK-DNA-FC17902836
ZFMK-TIS-36046	Barbus rionicus	-	22-Jul-2018	ZFMK	ZFMK-ICH-106114	Kintrishi	41.8033	41.7778	electro fishing	Georgia BioBlitz 2018	ZFMK-DNA-FC17902781
ZFMK-TIS-36047	Barbus rionicus	BOLD:AAD1959	22-Jul-2018	ZFMK	ZFMK-ICH-106115	Kintrishi	41.8033	41.7778	electro fishing	Georgia BioBlitz 2018	ZFMK-DNA-FC17902789
ZFMK-TIS-36205	Barbus rionicus	BOLD:AAD1959	21-Jul-2018	ZFMK	ZFMK-ICH-106273	Kintrishi	41.8033	41.7778	electro fishing	Georgia BioBlitz 2018	ZFMK-DNA-FC17902832
Ex42C10	Capoeta capoeta	BOLD:ACB8604	2006-08-07	FSJF	FSJF-DNA-1783	Kura	41.586	45.599	hand net	PC	-
Ex42C9	Capoeta capoeta	BOLD:ACB8604	2006-08-07	FSJF	FSJF-DNA-1783	Kura	41.586	45.599	hand net	PC	-
Ex42D9	Capoeta capoeta	BOLD:ACB8604	2006-08-07	FSJF	FSJF-DNA-1789	Rioni	42.169	42.431	hand net	PC	-
8005830	Capoeta capoeta	BOLD:ACB8604	08-Jul-2019	ZFMK	ZFMK-ICH-106204	Kakheti	41.867	45.81	electro fishing and frame net	Georgia BioBlitz 2019	ZFMK-DNA-FD05085668
8005831	Capoeta capoeta	BOLD:ACB8604	08-Jul-2019	ZFMK	ZFMK-ICH-106205	Kakheti	41.867	45.81	electro fishing and frame net	Georgia BioBlitz 2019	ZFMK-DNA-FD05085684
8007862	Capoeta capoeta	BOLD:ACB8604	05-Jul-2019	ZFMK	ZFMK-ICH-106162	Kura	42.234	44.845	electro fishing	Georgia BioBlitz 2019	ZFMK-DNA-FD05085377
8007863	Capoeta capoeta	BOLD:ACB8604	05-Jul-2019	ZFMK	ZFMK-ICH-106163	Kura	42.234	44.845	electro fishing	Georgia BioBlitz 2019	ZFMK-DNA-FD05085385
8007879	Capoeta capoeta	BOLD:ACB8604	07-Jul-2019	ZFMK	ZFMK-ICH-106191	Kura	41.972	44.755	electro fishing	Georgia BioBlitz 2019	ZFMK-DNA-FD05085418
8007880	Capoeta capoeta	BOLD:ACB8604	07-Jul-2019	ZFMK	ZFMK-ICH-106192	Kura	41.972	44.755	electro fishing	Georgia BioBlitz 2019	ZFMK-DNA-FD05085426
Ex24D3	Capoeta capoeta	BOLD:ACB8604	2006-08-02	ZFMK	ZFMK-ICH-TIS-NB141	Kura	41.586	45.599	hand net	PC	ZFMK-DNA-0100416185
Ex72C5	Capoeta capoeta	BOLD:ACB8604	2006-08-07	ZFMK	ZFMK-ICH-TIS-C16-6	Rioni	42.169	42.431	hand net	PC	-
8005828	Carassius gibelio	BOLD:AAA7176	08-Jul-2019	ZFMK	ZFMK-ICH-106202	Kakheti	41.867	45.81	electro fishing and frame net	Georgia BioBlitz 2019	ZFMK-DNA-FD05085723
8005829	Carassius gibelio	BOLD:AAA7176	08-Jul-2019	ZFMK	ZFMK-ICH-106203	Kakheti	41.867	45.81	electro fishing and frame net	Georgia BioBlitz 2019	ZFMK-DNA-FD05085747
8007882	Carassius gibelio	BOLD:AAA7176	07-Jul-2019	ZFMK	ZFMK-ICH-106196	Kura	41.972	44.755	electro fishing	Georgia BioBlitz 2019	ZFMK-DNA-FD05085442
Ex71B11	Carassius gibelio	BOLD:AAA7176	2007-07-29	ZFMK	ZFMK-ICH-TIS-K2-2	Kodor	42.797	41.191	hand net	PC	-
Ex71B12	Carassius gibelio	BOLD:AAA7176	2007-07-29	ZFMK	ZFMK-ICH-TIS-K2-2	Kodor	42.797	41.191	hand net	PC	-
Ex71C1	Carassius gibelio	BOLD:AAA7176	2007-07-29	ZFMK	ZFMK-ICH-TIS-K2-2	Kodor	42.797	41.191	hand net	PC	-
36015	Chondrostoma colchicum	BOLD:AAD7920	21-Jul-2018	ZFMK	ZFMK-ICH-106278	Kintrishi	41.8033	41.7778	electro fishing	Georgia BioBlitz 2018	ZFMK-DNA-FC17902848
Ex24H10	Chondrostoma colchicum	BOLD:AAD7920	2006-08-07	ZFMK	ZFMK-ICH-TIS-NB194 & ZFMK ICH -103493-103494	Rioni	42.662	41.658	hand net	PC	ZFMK-DNA-0100416144
Ex24H9	Chondrostoma colchicum	BOLD:AAD7920	2006-08-07	ZFMK	ZFMK-ICH-TIS-NB194 & ZFMK ICH -103493-103494	Rioni	42.662	41.658	hand net	PC	ZFMK-DNA-0100416404
Ex71C2	Chondrostoma colchicum	BOLD:AAD7920	2007-08-01	ZFMK	ZFMK-ICH-TIS-K10-10	Kodor	42.958	41.288	hand net	PC	-
Ex71C3	Chondrostoma colchicum	BOLD:AAD7920	2007-08-01	ZFMK	ZFMK-ICH-TIS-K10-10	Kodor	42.958	41.288	hand net	PC	-
Ex72C8	Chondrostoma colchicum	BOLD:AAD7920	2007-07-29	ZFMK	ZFMK-ICH-TIS-K4-1	Galidzga	42.708	41.485	hand net	PC	-
ZFMK-TIS-36054	Chondrostoma colchicum	BOLD:AAD7920	22-Jul-2018	ZFMK	ZFMK-ICH-106122	Kintrishi	41.8016	41.8095	electro fishing	Georgia BioBlitz 2018	ZFMK-DNA-FC17902821
ZFMK-TIS-36164	Chondrostoma colchicum	BOLD:AAD7920	22-Jul-2018	ZFMK	ZFMK-ICH-106232	Kintrishi	41.8033	41.7778	electro fishing	Georgia BioBlitz 2018	ZFMK-DNA-FC17902846
ZFMK-TIS-36171	Chondrostoma colchicum	BOLD:AAD7920	21-Jul-2018	ZFMK	ZFMK-ICH-106239	Kintrishi	41.7991	41.848	electro fishing	Georgia BioBlitz 2018	ZFMK-DNA-FC17902791
ZFMK-TIS-36172	Chondrostoma colchicum	BOLD:AAD7920	21-Jul-2018	ZFMK	ZFMK-ICH-106240	Kintrishi	41.7991	41.848	electro fishing	Georgia BioBlitz 2018	ZFMK-DNA-FC17902799
ZFMK-TIS-36210	Chondrostoma colchicum	BOLD:AAD7920	21-Jul-2018	ZFMK	ZFMK-ICH-106278	Kintrishi	41.8033	41.7778	electro fishing	Georgia BioBlitz 2018	ZFMK-DNA-FC17902848
ZFMK-TIS-36212	Chondrostoma colchicum	BOLD:AAD7920	21-Jul-2018	ZFMK	ZFMK-ICH-106280	Kintrishi	41.8033	41.7778	electro fishing	Georgia BioBlitz 2018	ZFMK-DNA-FC17902864
Ex24D11	Chondrostoma cyri	BOLD:AAD7920	2006-08-03	ZFMK	ZFMK-ICH-TIS-NB157	Kura	41.767	45.924	hand net	PC	ZFMK-DNA-0100416415
Ex24D12	Chondrostoma cyri	BOLD:AAD7920	2006-08-03	ZFMK	ZFMK-ICH-TIS-NB157	Kura	41.767	45.924	hand net	PC	ZFMK-DNA-0100416194
Ex24E1	Chondrostoma cyri	-	2006-08-03	ZFMK	ZFMK-ICH-TIS-NB158	Kura	41.767	45.924	hand net	PC	ZFMK-DNA-0100416182
WH02H7	Chondrostoma cyri	BOLD:AAD7920	2006-08-03	ZFMK	ZFMK-ICH-TIS-NB158	Kura	41.767	45.924	hand net	PC	-
8005832	Cobitis saniae	BOLD:ADL2980	08-Jul-2019	ZFMK	ZFMK-ICH-106210	Kakheti	41.867	45.81	electro fishing and frame net	Georgia BioBlitz 2019	ZFMK-DNA-FD05085700
8005833	Cobitis saniae	BOLD:ADL2980	08-Jul-2019	ZFMK	ZFMK-ICH-106211	Kakheti	41.867	45.81	electro fishing and frame net	Georgia BioBlitz 2019	ZFMK-DNA-FD05085716
8005834	Cobitis saniae	BOLD:ADL2980	08-Jul-2019	ZFMK	ZFMK-ICH-106212	Kakheti	41.867	45.81	electro fishing and frame net	Georgia BioBlitz 2019	ZFMK-DNA-FD05085732
Ex25A9	Cobitis satunini	BOLD:ADL5841	2006-08-08	ZFMK	ZFMK-ICH-TIS-NB199 & ZFMK ICH -103400-103407	Rioni	42.181	41.646	hand net	PC	-
Ex71A10	Cobitis satunini	BOLD:ADL5841	2006-08-08	ZFMK	ZFMK-ICH-TIS-C19-4	Rioni	42.1806	41.6461	hand net	PC	-
Ex71A11	Cobitis satunini	BOLD:ADL5841	2006-08-08	ZFMK	ZFMK-ICH-TIS-C19-4	Rioni	42.181	41.646	hand net	PC	-
Ex71A6	Cobitis satunini	BOLD:ADL5841	2006-08-07	ZFMK	ZFMK-ICH-TIS-C16-2	Rioni	42.169	42.431	hand net	PC	-
Ex71A7	Cobitis satunini	BOLD:ADL5841	2006-08-07	ZFMK	ZFMK-ICH-TIS-C16-2	Rioni	42.169	42.431	hand net	PC	-
Ex71C6	Cobitis satunini	BOLD:ADL5841	2007-07-31	ZFMK	ZFMK-ICH-TIS-K7-1	Galidzga	42.688	41.512	hand net	PC	-
Ex97H8	Cobitis satunini	BOLD:ADL5841	data still missing as of 08.082013	ZFMK	ZFMK-ICH-TIS-NB1081	Kodor	Data missing	Data missing	hand net	PC	-
Ex97H9	Cobitis satunini	BOLD:ADL5841	data still missing as of 08.082013	ZFMK	ZFMK-ICH-TIS-NB1081	Kodor	Data missing	Data missing	hand net	PC	-
WH03A10	Cobitis satunini	BOLD:ADL5841	2006-08-07	ZFMK	ZFMK-ICH-TIS-NB186 & ZFMK ICH -103098-103104	Rioni	42.169	42.431	hand net	PC	-
ZFMK-TIS-36023	Cobitis satunini	BOLD:ADL5841	21-Jul-2018	ZFMK	ZFMK-ICH-106091	Kintrishi	41.8033	41.7778	electro fishing	Georgia BioBlitz 2018	ZFMK-DNA-FC17902867
ZFMK-TIS-36024	Cobitis satunini	BOLD:ADL5841	21-Jul-2018	ZFMK	ZFMK-ICH-106092	Kintrishi	41.8033	41.7778	electro fishing	Georgia BioBlitz 2018	ZFMK-DNA-FC17902780
ZFMK-TIS-36025	Cobitis satunini	BOLD:ADL5841	21-Jul-2018	ZFMK	ZFMK-ICH-106093	Kintrishi	41.8033	41.7778	electro fishing	Georgia BioBlitz 2018	ZFMK-DNA-FC17902788
ZFMK-TIS-36192	Cobitis satunini	-	19-Jul-2018	ZFMK	ZFMK-ICH-106260	Pichori	42.085	42.0246	hand net	Georgia BioBlitz 2018	ZFMK-DNA-FC17902784
ZFMK-TIS-36193	Cobitis satunini	BOLD:ADL5841	19-Jul-2018	ZFMK	ZFMK-ICH-106261	Pichori	42.085	42.0246	hand net	Georgia BioBlitz 2018	ZFMK-DNA-FC17902792
Ex25A12	Esox lucius	BOLD:AAA5988	2006-08-08	ZFMK	ZFMK-ICH-TIS-NB201	Rioni	42.181	41.646	hand net	PC	-
Ex72D3	Esox lucius	BOLD:AAA5988	2007-07-31	ZFMK	ZFMK-ICH-TIS-K7-7	Galidzga	42.688	41.512	hand net	PC	-
Ex24H7	Gambusia holbrooki	BOLD:AAC2757	2006-08-07	ZFMK	ZFMK-ICH-TIS-NB192 & ZFMK ICH -103342-103351	Rioni	42.169	42.431	hand net	PC	ZFMK-DNA-0100416141
Ex24H8	Gambusia holbrooki	BOLD:AAC2757	2006-08-07	ZFMK	ZFMK-ICH-TIS-NB192 & ZFMK ICH -103342-103351	Rioni	42.169	42.431	hand net	PC	ZFMK-DNA-0100416142
ZFMK-TIS-36174	Gambusia holbrooki	BOLD:AAC2757	21-Jul-2018	ZFMK	ZFMK-ICH-106242	Kintrishi	41.8033	41.7778	electro fishing	Georgia BioBlitz 2018	ZFMK-DNA-FC17902807
ZFMK-TIS-36175	Gambusia holbrooki	BOLD:AAC2757	21-Jul-2018	ZFMK	ZFMK-ICH-106243	Kintrishi	41.8033	41.7778	electro fishing	Georgia BioBlitz 2018	ZFMK-DNA-FC17902815
Ex71B10	Gasterosteus aculeatus	BOLD:AAA8488	2007-08-03	ZFMK	ZFMK-ICH-TIS-NB244	Bzyp	43.167	40.319	hand net	PC	-
Ex71B8	Gasterosteus aculeatus	BOLD:AAA8488	2007-08-03	ZFMK	ZFMK-ICH-TIS-NB244	Bzyp	43.167	40.319	hand net	PC	-
Ex71B9	Gasterosteus aculeatus	BOLD:AAA8488	2007-08-03	ZFMK	ZFMK-ICH-TIS-NB244	Bzyp	43.167	40.319	hand net	PC	-
Ex25C1	Gobio artvinicus	BOLD:ADF3232	2006-08-09	ZFMK	ZFMK-ICH-TIS-NB208	Natanebi	41.933	41.836	hand net	PC	-
Ex25C2	Gobio artvinicus	BOLD:ADF3232	2006-08-09	ZFMK	ZFMK-ICH-TIS-NB208	Natanebi	41.933	41.836	hand net	PC	-
ZFMK-TIS-36163	Gobio artvinicus	BOLD:ADF3232	24-Jul-2018	ZFMK	ZFMK-ICH-106231	Cherpalkas Canal	42.0654	41.9209	hand net	Georgia BioBlitz 2018	ZFMK-DNA-FC17902838
8007834	Gobio caucasicus	BOLD:ADF3232	05-Jun-2016	ISU	HIDGc4	Kura	41.5233	44.3814	hand net	PC	ZFMK-DNA-FD05085438
8007835	Gobio caucasicus	BOLD:ADF3232	05-Jun-2016	ISU	HIDGc4	Kura	41.5233	44.3814	hand net	PC	ZFMK-DNA-FD05085446
8007836	Gobio caucasicus	BOLD:ADF3232	05-Jun-2016	ISU	HIDGc4	Kura	41.5233	44.3814	hand net	PC	ZFMK-DNA-FD05085454
8007837	Gobio caucasicus	BOLD:ADF3232	05-Jun-2016	ISU	HIDGc4	Kura	41.5233	44.3814	hand net	PC	ZFMK-DNA-FD05085462
8007838	Gobio caucasicus	BOLD:ADF3232	05-Jun-2016	ISU	HIDGc4	Kura	41.5233	44.3814	hand net	PC	ZFMK-DNA-FD05085375
8007839	Gobio caucasicus	BOLD:ADF3232	05-Jun-2016	ISU	HIDGc4	Kura	41.5233	44.3814	hand net	PC	ZFMK-DNA-FD05085383
8007840	Gobio caucasicus	BOLD:ADF3232	05-Jun-2016	ISU	HIDGc4	Kura	41.5233	44.3814	hand net	PC	ZFMK-DNA-FD05085391
8007841	Gobio caucasicus	BOLD:ADF3232	05-Jun-2016	ISU	HIDGc4	Kura	41.5233	44.3814	hand net	PC	ZFMK-DNA-FD05085399
8007842	Gobio caucasicus	BOLD:ADF3232	05-Jun-2016	ISU	HIDGc4	Kura	41.5233	44.3814	hand net	PC	ZFMK-DNA-FD05085407
8007843	Gobio caucasicus	BOLD:ADF3232	01-Nov-2018	ISU	HIDGC5	Kura	41.2356	43.672	electro fishing	PC	ZFMK-DNA-FD05085415
8007844	Gobio caucasicus	BOLD:ADF3232	01-Nov-2018	ISU	HIDGC5	Kura	41.2356	43.672	electro fishing	PC	ZFMK-DNA-FD05085423
8007845	Gobio caucasicus	BOLD:ADF3232	01-Nov-2018	ISU	HIDGC5	Kura	41.2356	43.672	electro fishing	PC	ZFMK-DNA-FD05085431
8007846	Gobio caucasicus	BOLD:ADF3232	01-Nov-2018	ISU	HIDGC5	Kura	41.2356	43.672	electro fishing	PC	ZFMK-DNA-FD05085439
8007847	Gobio caucasicus	BOLD:ADF3232	01-Nov-2018	ISU	HIDGC5	Kura	41.2356	43.672	electro fishing	PC	ZFMK-DNA-FD05085447
8007848	Gobio caucasicus	BOLD:ADF3232	01-Nov-2018	ISU	HIDGC5	Kura	41.2356	43.672	electro fishing	PC	ZFMK-DNA-FD05085455
8007849	Gobio caucasicus	BOLD:ADF3232	01-Nov-2018	ISU	HIDGC5	Kura	41.2356	43.672	electro fishing	PC	ZFMK-DNA-FD05085463
8007850	Gobio caucasicus	BOLD:ADF3232	01-Nov-2018	ISU	HIDGC5	Kura	41.2356	43.672	electro fishing	PC	ZFMK-DNA-FD05085376
8007851	Gobio caucasicus	BOLD:ADF3232	01-Nov-2018	ISU	HIDGC5	Kura	41.2356	43.672	electro fishing	PC	ZFMK-DNA-FD05085384
8007852	Gobio caucasicus	BOLD:ADF3232	01-Nov-2018	ISU	HIDGC5	Kura	41.2356	43.672	electro fishing	PC	ZFMK-DNA-FD05085392
8007873	Gobio caucasicus	BOLD:ADF3232	07-Jul-2019	ZFMK	ZFMK-ICH-106182	Kura	41.972	44.755	electro fishing	Georgia BioBlitz 2019	ZFMK-DNA-FD05085465
8007874	Gobio caucasicus	BOLD:ADF3232	07-Jul-2019	ZFMK	ZFMK-ICH-106183	Kura	41.972	44.755	electro fishing	Georgia BioBlitz 2019	ZFMK-DNA-FD05085378
8007875	Gobio caucasicus	BOLD:ADF3232	07-Jul-2019	ZFMK	ZFMK-ICH-106184	Kura	41.972	44.755	electro fishing	Georgia BioBlitz 2019	ZFMK-DNA-FD05085386
Ex24G1	Gobio caucasicus	BOLD:ADF3232	2006-08-05	ZFMK	ZFMK-ICH-TIS-NB177	Kura	41.994	44.76	hand net	PC	ZFMK-DNA-0100416158
Ex25B1	Gymnocephalus cernua	BOLD:AAB0392	2006-08-08	ZFMK	ZFMK-ICH-TIS-NB202	Rioni	42.1806	41.6461	hand net	PC	-
Ex25B2	Gymnocephalus cernua	BOLD:AAB0392	2006-08-08	ZFMK	ZFMK-ICH-TIS-NB202	Rioni	42.1806	41.6461	hand net	PC	-
Ex71A12	Gymnocephalus cernua	BOLD:AAB0392	2006-08-08	ZFMK	ZFMK-ICH-TIS-C19-7	Rioni	42.1806	41.6461	hand net	PC	-
Ex71B1	Gymnocephalus cernua	BOLD:AAB0392	2006-08-08	ZFMK	ZFMK-ICH-TIS-C19-7	Rioni	42.1806	41.6461	hand net	PC	-
Ex73B10	Knipowitschia caucasica	BOLD:AAE8660	2007-07-29	ZFMK	ZFMK-ICH-TIS-K1-5	Kodor	42.7969	41.1906	hand net	PC	-
Ex73B12	Knipowitschia caucasica	BOLD:AAE8660	2007-07-29	ZFMK	ZFMK-ICH-TIS-K1-10	Kodor	42.7969	41.1906	hand net	PC	-
C25-1-2	Lampetra ninae	BOLD:ABY6638	09-Aug-2006	RAS	ZFMK-ICH-TIS-NB209	Kintrishi	41.803	41.778	hand net	PC	-
K13-2-1	Lampetra ninae	BOLD:ABY6638	02-Aug-2007	RAS	na	Bzyb	43.194	40.294	hand net	PC, probably wrong sample location	-
K6-11-1	Lampetra ninae	BOLD:ABY6638	30-Jul-2007	RAS	na	Mokva	42.767	41.466	hand net	PC	-
K6-12-1	Lampetra ninae	BOLD:ABY6638	30-Jul-2007	RAS	na	Mokva	42.767	41.466	hand net	PC	-
K6-12-2	Lampetra ninae	BOLD:ABY6638	30-Jul-2007	RAS	na	Mokva	42.767	41.466	hand net	PC	-
K6-13-1	Lampetra ninae	BOLD:ABY6638	30-Jul-2007	RAS	na	Mokva	42.767	41.466	hand net	PC	-
Ex25C3	Lampetra ninae	BOLD:ABY6638	2006-08-09	ZFMK	ZFMK-ICH-TIS-NB209	Natanebi	41.8033	41.7775	hand net	PC	-
Ex25C4	Lampetra ninae	BOLD:ABY6638	2006-08-09	ZFMK	ZFMK-ICH-TIS-NB209	Kintrishi	41.8033	41.7775	hand net	PC	-
WH03B5	Lampetra ninae	BOLD:ABY6638	2006-08-09	ZFMK	ZFMK-ICH-TIS-NB209	Kintrishi	41.8033	41.7775	hand net	PC	-
ZFMK-TIS-36048	Lampetra ninae	BOLD:ABY6638	22-Jul-2018	ZFMK	ZFMK-ICH-106116	Kintrishi	41.8033	41.7778	electro fishing	Georgia BioBlitz 2018	ZFMK-DNA-FC17902797
ZFMK-TIS-36049	Lampetra ninae	BOLD:ABY6638	22-Jul-2018	ZFMK	ZFMK-ICH-106117	Kintrishi	41.8033	41.7778	electro fishing	Georgia BioBlitz 2018	ZFMK-DNA-FC17902805
ZFMK-TIS-36050	Lampetra ninae	BOLD:ABY6638	22-Jul-2018	ZFMK	ZFMK-ICH-106118	Kintrishi	41.8033	41.7778	electro fishing	Georgia BioBlitz 2018	ZFMK-DNA-FC17902813
ZFMK-TIS-36064	Lampetra ninae	BOLD:ABY6638	22-Jul-2018	ZFMK	ZFMK-ICH-106132	Kintrishi	41.8016	41.8095	electro fishing	Georgia BioBlitz 2018	ZFMK-DNA-FC17902782
ZFMK-TIS-36065	Lampetra ninae	BOLD:ABY6638	22-Jul-2018	ZFMK	ZFMK-ICH-106133	Kintrishi	41.8016	41.8095	electro fishing	Georgia BioBlitz 2018	ZFMK-DNA-FC17902790
Ex72D5	Leucaspius delineatus	-	2007-07-31	ZFMK	ZFMK-ICH-TIS-K7-11	Galidzga	42.6881	41.5119	hand net	PC	-
Ex73B6	Leucaspius delineatus	BOLD:ACL6573	2007-07-31	ZFMK	ZFMK-ICH-TIS-K7-4	Galidzga	42.6881	41.5119	hand net	PC	-
8007802	Luciobarbus capito	BOLD:ADC9652	22-May-2019	ISU	HIDLc1	Kakheti	41.6806	46.0756	electro fishing	PC	ZFMK-DNA-FD05085372
8007803	Luciobarbus capito	BOLD:ADC9652	22-May-2019	ISU	HIDLc1	Kakheti	41.6806	46.0756	electro fishing	PC	ZFMK-DNA-FD05085380
8007804	Luciobarbus capito	BOLD:ADC9652	22-May-2019	ISU	HIDLc1	Kakheti	41.6806	46.0756	electro fishing	PC	ZFMK-DNA-FD05085388
8007805	Luciobarbus capito	BOLD:ADC9652	22-May-2019	ISU	HIDLc1	Kakheti	41.6806	46.0756	electro fishing	PC	ZFMK-DNA-FD05085396
8007806	Luciobarbus capito	BOLD:ADC9652	22-May-2019	ISU	HIDLc1	Kakheti	41.6806	46.0756	electro fishing	PC	ZFMK-DNA-FD05085404
8007807	Luciobarbus capito	BOLD:ADC9652	22-May-2019	ISU	HIDLc1	Kakheti	41.6806	46.0756	electro fishing	PC	ZFMK-DNA-FD05085412
8007808	Luciobarbus capito	BOLD:ADC9652	22-May-2019	ISU	HIDLc1	Kakheti	41.6806	46.0756	electro fishing	PC	ZFMK-DNA-FD05085420
Ex42B7	Luciobarbus mursa	BOLD:ADK8086	2006-08-03	FSJF	FSJF-DNA-1776	Kura	41.7672	45.9242	hand net	PC	-
Ex42B8	Luciobarbus mursa	BOLD:ADK8086		FSJF	FSJF-DNA-1776	Kura	41.7672	45.9242	hand net	PC	-
Ex42C2	Luciobarbus mursa	BOLD:ADK8086	2004-06-18	FSJF	FSJF-DNA-1779	Kura	41.5783	45.6128	hand net	PC	-
8007812	Luciobarbus mursa	BOLD:ADK8086	30-Jun-2019	ISU	HIDLm2	Kura	41.9628	44.5265	electro fishing	PC	ZFMK-DNA-FD05085452
8007813	Luciobarbus mursa	BOLD:ADK8086	30-Jun-2019	ISU	HIDLm2	Kura	41.9628	44.5265	electro fishing	PC	ZFMK-DNA-FD05085460
8007814	Luciobarbus mursa	BOLD:ADK8086	08-Jul-2019	ISU	HIDLm3	Kakheti	41.867	45.81	electro fishing	PC	ZFMK-DNA-FD05085373
8007820	Luciobarbus mursa	-	25-Jul-2019	ISU	HIDLm1	Kakheti	41.9351	45.6891	electro fishing	PC	ZFMK-DNA-FD05085421
Ex24E3	Luciobarbus mursa	BOLD:ADK8086	2006-08-03	ZFMK	ZFMK-ICH-TIS-NB159	Kura	41.7672	45.9242	hand net	PC	ZFMK-DNA-0100416367
Ex25A5	Neogobius fluviatilis	BOLD:ABA9510	2006-08-08	ZFMK	ZFMK-ICH-TIS-NB198 ZFMK ICH -103368-103375	Rioni	42.1806	41.6461	hand net	PC	-
Ex25A6	Neogobius fluviatilis	BOLD:ABA9510	2006-08-08	ZFMK	ZFMK-ICH-TIS-NB198 ZFMK ICH -103368-103375	Rioni	42.1806	41.6461	hand net	PC	-
Ex25A7	Neogobius fluviatilis	BOLD:ABA9510	2006-08-08	ZFMK	ZFMK-ICH-TIS-NB198 ZFMK ICH -103368-103375	Rioni	42.1806	41.6461	hand net	PC	-
ZFMK-TIS-36021	Neogobius fluviatilis	BOLD:ABA9510	21-Jul-2018	ZFMK	ZFMK-ICH-106089	Kintrishi	41.8033	41.7778	electro fishing	Georgia BioBlitz 2018	ZFMK-DNA-FC17902851
ZFMK-TIS-36022	Neogobius fluviatilis	BOLD:ABA9510	21-Jul-2018	ZFMK	ZFMK-ICH-106090	Kintrishi	41.8033	41.7778	electro fishing	Georgia BioBlitz 2018	ZFMK-DNA-FC17902859
ZFMK-TIS-36002	Neogobius melanostomus	BOLD:AAC0218	19-Jul-2018	ZFMK	ZFMK-ICH-106070	Guria	42.0535	41.726	local fishermen, beach seine	Georgia BioBlitz 2018	ZFMK-DNA-FC17902834
ZFMK-TIS-36003	Neogobius melanostomus	BOLD:AAC0218	19-Jul-2018	ZFMK	ZFMK-ICH-106071	Guria	42.0535	41.726	local fishermen, beach seine	Georgia BioBlitz 2018	ZFMK-DNA-FC17902842
ZFMK-TIS-36004	Neogobius melanostomus	BOLD:AAC0218	19-Jul-2018	ZFMK	ZFMK-ICH-106072	Guria	42.0535	41.726	local fishermen, beach seine	Georgia BioBlitz 2018	ZFMK-DNA-FC17902850
ZFMK-TIS-36005	Neogobius melanostomus	BOLD:AAC0218	19-Jul-2018	ZFMK	ZFMK-ICH-106073	Guria	42.0535	41.726	local fishermen, beach seine	Georgia BioBlitz 2018	ZFMK-DNA-FC17902858
ZFMK-TIS-36032	Oncorhynchus mykiss	BOLD:AAA1627	21-Jul-2018	ZFMK	ZFMK-ICH-106100	Kintrishi	41.7991	41.848	electro fishing	Georgia BioBlitz 2018	ZFMK-DNA-FC17902812
8005826	Oxynoemacheilus brandtii	BOLD:ADL9692	07-Jul-2019	ZFMK	ZFMK-ICH-106200	Kura	41.972	44.755	electro fishing	Georgia BioBlitz 2019	ZFMK-DNA-FD05085691
8005827	Oxynoemacheilus brandtii	BOLD:ADL9692	07-Jul-2019	ZFMK	ZFMK-ICH-106201	Kura	41.972	44.755	electro fishing	Georgia BioBlitz 2019	ZFMK-DNA-FD05085707
8005839	Oxynoemacheilus brandtii	BOLD:ADL9692	08-Jul-2019	ZFMK	ZFMK-ICH-106217	Kakheti	41.867	45.81	electro fishing and frame net	Georgia BioBlitz 2019	ZFMK-DNA-FD05085749
8005840	Oxynoemacheilus brandtii	BOLD:ADL9692	08-Jul-2019	ZFMK	ZFMK-ICH-106218	Kakheti	41.867	45.81	electro fishing and frame net	Georgia BioBlitz 2019	ZFMK-DNA-FD05085678
8005841	Oxynoemacheilus brandtii	BOLD:ADL9692	08-Jul-2019	ZFMK	ZFMK-ICH-106219	Kakheti	41.867	45.81	electro fishing and frame net	Georgia BioBlitz 2019	ZFMK-DNA-FD05085710
Ex24D5	Oxynoemacheilus brandtii	BOLD:ADL9692	2006-08-02	ZFMK	ZFMK-ICH-TIS-NB147	Kura	41.5861	45.5986	hand net	PC	ZFMK-DNA-0100416187
Ex24D6	Oxynoemacheilus brandtii	BOLD:ADL9692	2006-08-02	ZFMK	ZFMK-ICH-TIS-NB148	Kura	41.8631	45.8153	hand net	PC	ZFMK-DNA-0100416188
Ex24D7	Oxynoemacheilus brandtii	BOLD:ADL9692	2006-08-03	ZFMK	ZFMK-ICH-TIS-NB149	Kura	41.8631	45.8153	hand net	PC	ZFMK-DNA-0100416189
Ex24D8	Oxynoemacheilus brandtii	BOLD:ADL9692	2006-08-03	ZFMK	ZFMK-ICH-TIS-NB152	Kura	41.8631	45.8153	hand net	PC	ZFMK-DNA-0100416190
Ex24F1	Oxynoemacheilus brandtii	BOLD:ADL9692	2006-08-04	ZFMK	ZFMK-ICH-TIS-NB167	Kura	41.355	45.0831	hand net	PC	ZFMK-DNA-0100416159
Ex24F10	Oxynoemacheilus brandtii	BOLD:ADL9692	2006-08-05	ZFMK	ZFMK-ICH-TIS-NB175	Kura	41.9936	44.7603	hand net	PC	ZFMK-DNA-0100416168
Ex24F11	Oxynoemacheilus brandtii	BOLD:ADL9692	2006-08-05	ZFMK	ZFMK-ICH-TIS-NB176	Kura	41.9936	44.7603	hand net	PC	ZFMK-DNA-0100416169
Ex24F2	Oxynoemacheilus brandtii	BOLD:ADL9692	2006-08-04	ZFMK	ZFMK-ICH-TIS-NB167	Kura	41.355	45.0831	hand net	PC	ZFMK-DNA-0100416354
Ex24G7	Oxynoemacheilus sp.	BOLD:ADM2519	2006-08-06	ZFMK	ZFMK-ICH-TIS-NB184	Rioni	42.0975	43.39	hand net	PC	ZFMK-DNA-0100416152
Ex24H11	Oxynoemacheilus sp.	BOLD:ADM2519	2006-08-07	ZFMK	ZFMK-ICH-TIS-NB195	Rioni	42.6617	41.6578	hand net	PC	ZFMK-DNA-0100416145
Ex24H4	Oxynoemacheilus sp.	BOLD:ADM2519	2006-08-07	ZFMK	ZFMK-ICH-TIS-NB190	Rioni	42.1694	42.4314	hand net	PC	ZFMK-DNA-0100416138
Ex24H5	Oxynoemacheilus sp.	BOLD:ADM2519	2006-08-07	ZFMK	ZFMK-ICH-TIS-NB190	Rioni	42.1694	42.4314	hand net	PC	ZFMK-DNA-0100416139
Ex24H6	Oxynoemacheilus sp.	BOLD:ADM2519	2006-08-07	ZFMK	ZFMK-ICH-TIS-NB191	Rioni	42.1694	42.4314	hand net	PC	ZFMK-DNA-0100416140
ZFMK-TIS-36069	Oxynoemacheilus sp.	BOLD:ADM2519	19-Jul-2018	ZFMK	ZFMK-ICH-106137	Cherpalkas Canal	42.0783	41.9164	hand net	Georgia BioBlitz 2018	ZFMK-DNA-FC17902798
ZFMK-TIS-36070	Oxynoemacheilus sp.	BOLD:ADM2519	24-Jul-2018	ZFMK	ZFMK-ICH-106138	Cherpalkas Canal	42.073	41.9168	hand net	Georgia BioBlitz 2018	ZFMK-DNA-FC17902806
ZFMK-TIS-36071	Oxynoemacheilus sp.	BOLD:ADM2519	24-Jul-2018	ZFMK	ZFMK-ICH-106139	Rioni	42.1625	42.4107	hand net	Georgia BioBlitz 2018	ZFMK-DNA-FC17902814
ZFMK-TIS-36072	Oxynoemacheilus sp.	-	24-Jul-2018	ZFMK	ZFMK-ICH-106140	Rioni	42.1625	42.4107	hand net	Georgia BioBlitz 2018	ZFMK-DNA-FC17902822
Ex25A10	Perca fluviatilis	BOLD:AAB0356	2006-08-08	ZFMK	ZFMK-ICH-TIS-NB200 & ZFMK ICH -103413-103420	Rioni	42.1806	41.6461	hand net	PC	-
Ex25A11	Perca fluviatilis	BOLD:AAB0356	2006-08-08	ZFMK	ZFMK-ICH-TIS-NB200 & ZFMK ICH -103413-103420	Rioni	42.1806	41.6461	hand net	PC	-
Ex24H2	Petroleuciscus borysthenicus	BOLD:ACB4660	2006-08-07	ZFMK	ZFMK-ICH-TIS-NB187	Rioni	42.1694	42.4314	hand net	PC	ZFMK-DNA-0100416136
Ex24H3	Petroleuciscus borysthenicus	BOLD:ACB4660	2006-08-07	ZFMK	ZFMK-ICH-TIS-NB187	Rioni	42.1694	42.4314	hand net	PC	ZFMK-DNA-0100416137
Ex25B10	Phoxinus colchicus	BOLD:ACU3022	2006-08-09	ZFMK	NB207	Natanebi	41.933	41.836	hand net	PC	-
Ex25B11	Phoxinus colchicus	BOLD:ACU3022	2006-08-09	ZFMK	ZFMK-ICH-TIS-NB207	Natanebi	41.9331	41.8361	hand net	PC	-
Ex25B12	Phoxinus colchicus	BOLD:ACU3022	2006-08-09	ZFMK	ZFMK-ICH-TIS-NB207	Natanebi	41.9331	41.8361	hand net	PC	-
Ex71C8	Phoxinus colchicus	BOLD:ACU3022	2007-08-03	ZFMK	K161	Mchishta	43.215	40.515	hand net	PC	-
ZFMK-TIS-36033	Phoxinus colchicus	BOLD:ACU3022	21-Jul-2018	ZFMK	ZFMK-ICH-106101	Kintrishi	41.7991	41.848	electro fishing	Georgia BioBlitz 2018	ZFMK-DNA-FC17902820
ZFMK-TIS-36060	Phoxinus colchicus	BOLD:ACU3022	22-Jul-2018	ZFMK	ZFMK-ICH-106128	Kintrishi	41.8016	41.8095	electro fishing	Georgia BioBlitz 2018	ZFMK-DNA-FC17902853
ZFMK-TIS-36061	Phoxinus colchicus	BOLD:ACU3022	22-Jul-2018	ZFMK	ZFMK-ICH-106129	Kintrishi	41.8016	41.8095	electro fishing	Georgia BioBlitz 2018	ZFMK-DNA-FC17902861
ZFMK-TIS-36062	Phoxinus colchicus	BOLD:ACU3022	22-Jul-2018	ZFMK	ZFMK-ICH-106130	Kintrishi	41.8016	41.8095	electro fishing	Georgia BioBlitz 2018	ZFMK-DNA-FC17902869
ZFMK-TIS-36195	Phoxinus colchicus	BOLD:ACU3022	19-Jul-2018	ZFMK	ZFMK-ICH-106263	Pichori	42.085	42.0246	hand net	Georgia BioBlitz 2018	ZFMK-DNA-FC17902800
Ex71C4	Ponticola constructor	BOLD:ADL4588	2007-07-29	ZFMK	ZFMK-ICH-TIS-K4-8	Galidzga	42.7078	41.485	hand net	PC	-
Ex71C5	Ponticola constructor	BOLD:ADL4588	2007-07-29	ZFMK	ZFMK-ICH-TIS-K4-8	Galidzga	42.7078	41.485	hand net	PC	-
Ex72C11	Ponticola constructor	BOLD:ADL4588	2007-08-02	ZFMK	ZFMK-ICH-TIS-K11-5	Kelasuri	43.0069	41.1264	hand net	PC	-
Ex72C12	Ponticola constructor	BOLD:ADL4588	2007-08-02	ZFMK	ZFMK-ICH-TIS-K11-5	Kelasuri	43.0069	41.1264	hand net	PC	-
Ex72C6	Ponticola constructor	BOLD:ADL4588	2006-08-09	ZFMK	ZFMK-ICH-TIS-C25-2	Kintrishi	41.8033	41.7775	hand net	PC	-
Ex72C7	Ponticola constructor	BOLD:ADL4588	2006-08-09	ZFMK	ZFMK-ICH-TIS-C25-2	Kintrishi	41.8033	41.7775	hand net	PC	-
Ex73B5	Ponticola constructor	BOLD:ADL4588	Data missing	ZFMK	ZFMK-ICH-TIS-K5-5	Mokva	42.9183	41.5419	hand net	PC	-
ZFMK-TIS-36008	Ponticola constructor	BOLD:ADL4588	21-Jul-2018	ZFMK	ZFMK-ICH-106076	Kintrishi	41.8033	41.7778	electro fishing	Georgia BioBlitz 2018	ZFMK-DNA-FC17902787
ZFMK-TIS-36009	Ponticola constructor	BOLD:ADL4588	21-Jul-2018	ZFMK	ZFMK-ICH-106077	Kintrishi	41.8033	41.7778	electro fishing	Georgia BioBlitz 2018	ZFMK-DNA-FC17902795
ZFMK-TIS-36039	Ponticola constructor	BOLD:ADL4588	21-Jul-2018	ZFMK	ZFMK-ICH-106107	Kintrishi	41.7991	41.848	electro fishing	Georgia BioBlitz 2018	ZFMK-DNA-FC17902860
ZFMK-TIS-36040	Ponticola constructor	BOLD:ADL4588	21-Jul-2018	ZFMK	ZFMK-ICH-106108	Kintrishi	41.7991	41.848	electro fishing	Georgia BioBlitz 2018	ZFMK-DNA-FC17902868
ZFMK-TIS-36176	Ponticola constructor	BOLD:ADL4588	19-Jul-2018	ZFMK	ZFMK-ICH-106244	Cherpalkas Canal	42.0783	41.9164	hand net	Georgia BioBlitz 2018	ZFMK-DNA-FC17902823
ZFMK-TIS-36187	Ponticola constructor	BOLD:ADL4588	19-Jul-2018	ZFMK	ZFMK-ICH-106255	Pichori	42.085	42.0246	hand net	Georgia BioBlitz 2018	ZFMK-DNA-FC17902863
ZFMK-TIS-36203	Ponticola constructor	BOLD:ADL4588	21-Jul-2018	ZFMK	ZFMK-ICH-106271	Kintrishi	41.8033	41.7778	electro fishing	Georgia BioBlitz 2018	ZFMK-DNA-FC17902824
8005825	Ponticola cyrius	BOLD:ADM6642	07-Jul-2019	ZFMK	ZFMK-ICH-106199	Kura	41.972	44.755	electro fishing	Georgia BioBlitz 2019	ZFMK-DNA-FD05085659
8007883	Ponticola cyrius	BOLD:ADM6642	07-Jul-2019	ZFMK	ZFMK-ICH-106197	Kura	41.972	44.755	electro fishing	Georgia BioBlitz 2019	ZFMK-DNA-FD05085450
8007884	Ponticola cyrius	BOLD:ADM6642	07-Jul-2019	ZFMK	ZFMK-ICH-106198	Kura	41.972	44.755	electro fishing	Georgia BioBlitz 2019	ZFMK-DNA-FD05085458
Ex72C3	Ponticola cyrius	BOLD:ADM6642	2006-08-06	ZFMK	ZFMK-ICH-TIS-C15-2	Rioni	42.0975	43.39	hand net	PC	-
Ex72C4	Ponticola cyrius	BOLD:ADM6642	2006-08-06	ZFMK	ZFMK-ICH-TIS-C15-2	Rioni	42.0975	43.39	hand net	PC	-
WH03A4	Ponticola cyrius	BOLD:ADM6642	2006-08-05	ZFMK	ZFMK-ICH-TIS-NB173 & ZFMK ICH -103143-103152	Kura	41.9936	44.7603	hand net	PC	-
K1-1	Proterorhinus nasalis	BOLD:AAD0669	29-Jul-2006	RAS	na	Kodor	42.797	41.191	hand net	PC	-
K1-2	Proterorhinus nasalis	BOLD:AAD0669	29-Jul-2006	RAS	na	Kodor	42.797	41.191	hand net	PC	-
K16-11-1	Proterorhinus nasalis	BOLD:ABY5094	04-Aug-2007	RAS	ZFMK-ICH-TIS-NB231	Mcnishta	43.215	40.515	hand net	PC	-
K16-11-2	Proterorhinus nasalis	BOLD:ABY5094	04-Aug-2007	RAS	na	Mcnishta	43.215	40.515	hand net	PC	-
K16-11-3	Proterorhinus nasalis	BOLD:ABY5094	04-Aug-2007	RAS	na	Mcnishta	43.215	40.515	hand net	PC	-
K16-11-4	Proterorhinus nasalis	BOLD:ABY5094	04-Aug-2007	RAS	na	Mcnishta	43.215	40.515	hand net	PC	-
ZFMK-TIS-36017	Proterorhinus nasalis	BOLD:AAD0669	21-Jul-2018	ZFMK	ZFMK-ICH-106085	Kintrishi	41.8033	41.7778	electro fishing	Georgia BioBlitz 2018	ZFMK-DNA-FC17902819
ZFMK-TIS-36018	Proterorhinus nasalis	BOLD:AAD0669	21-Jul-2018	ZFMK	ZFMK-ICH-106086	Kintrishi	41.8033	41.7778	electro fishing	Georgia BioBlitz 2018	ZFMK-DNA-FC17902827
ZFMK-TIS-36019	Proterorhinus nasalis	BOLD:AAD0669	21-Jul-2018	ZFMK	ZFMK-ICH-106087	Kintrishi	41.8033	41.7778	electro fishing	Georgia BioBlitz 2018	ZFMK-DNA-FC17902835
ZFMK-TIS-36020	Proterorhinus nasalis	BOLD:AAD0669	21-Jul-2018	ZFMK	ZFMK-ICH-106088	Kintrishi	41.8033	41.7778	electro fishing	Georgia BioBlitz 2018	ZFMK-DNA-FC17902843
ZFMK-TIS-36168	Proterorhinus nasalis	BOLD:ABY5094	22-Jul-2018	ZFMK	ZFMK-ICH-106236	Kintrishi	41.8033	41.7778	electro fishing	Georgia BioBlitz 2018	ZFMK-DNA-FC17902783
8005842	Pseudorasbora parva	BOLD:AAD0138	08-Jul-2019	ZFMK	ZFMK-ICH-121565	Kakheti	41.867	45.81	electro fishing and frame net	Georgia BioBlitz 2019	ZFMK-DNA-FD05085742
8005843	Pseudorasbora parva	BOLD:AAD0138	08-Jul-2019	ZFMK	ZFMK-ICH-121566	Kakheti	41.867	45.81	electro fishing and frame net	Georgia BioBlitz 2019	ZFMK-DNA-FD05085726
8007853	Rhinogobius lindbergi	BOLD:ACB4145	28-Apr-2017	ISU	HIDRsi1	Kakheti	41.5468	45.9826	hand net	PC	ZFMK-DNA-FD05085400
8007855	Rhinogobius lindbergi	BOLD:ACB4145	28-Apr-2017	ISU	HIDRsi1	Kakheti	41.5468	45.9826	hand net	PC	ZFMK-DNA-FD05085416
8007856	Rhinogobius lindbergi	BOLD:ACB4145	28-Apr-2017	ISU	HIDRsi1	Kakheti	41.5468	45.9826	hand net	PC	ZFMK-DNA-FD05085424
8007857	Rhinogobius lindbergi	BOLD:ACB4145	28-Apr-2017	ISU	HIDRsi1	Kakheti	41.5468	45.9826	hand net	PC	ZFMK-DNA-FD05085432
8007858	Rhinogobius lindbergi	BOLD:ACB4145	28-Apr-2017	ISU	HIDRsi1	Kakheti	41.5468	45.9826	hand net	PC	ZFMK-DNA-FD05085440
Ex24F3	Rhinogobius lindbergi	BOLD:ACB4145	2006-08-04	ZFMK	ZFMK-ICH-TIS-NB169	Kura	41.3511	45.0344	hand net	PC	ZFMK-DNA-0100416359
Ex24F4	Rhinogobius lindbergi	BOLD:ACB4145	2006-08-04	ZFMK	ZFMK-ICH-TIS-NB170	Kura	41.3511	45.0344	hand net	PC	ZFMK-DNA-0100416162
Ex72B10	Rhinogobius lindbergi	BOLD:ACB4145	2006-08-03	ZFMK	ZFMK-ICH-TIS-C10-7	Kura	41.7672	45.9242	hand net	PC	-
Ex72B11	Rhinogobius lindbergi	BOLD:ACB4145	2006-08-04	ZFMK	ZFMK-ICH-TIS-C11-6	Kura	41.355	45.0831	hand net	PC	-
C14-3-2	Rhodeus colchicus	BOLD:AAC4093	06-Aug-2006	RAS	ZFMK-ICH-TIS-NB180	Kura	42.05	43.679	hand net	PC	-
C14-3-4	Rhodeus colchicus	BOLD:AAC4093	06-Aug-2006	RAS	ZFMK-ICH-TIS-NB180	Kura	42.05	43.679	hand net	PC	-
C23-1-2	Rhodeus colchicus	BOLD:AAC4093	09-Aug-2006	RAS	ZFMK-ICH-TIS-NB206	Natanebi	41.943	41.928	hand net	PC	-
K1-11-4	Rhodeus colchicus	BOLD:AAC4093	29-Jul-2007	RAS	ZFMK-ICH-TIS-NB1082	Kodor	42.797	41.19	hand net	PC	-
Ex25B8	Rhodeus colchicus	BOLD:AAC4093	2006-08-09	ZFMK	ZFMK-ICH-TIS-NB206	Natanebi	41.9331	41.8361	hand net	PC	-
Ex25B9	Rhodeus colchicus	BOLD:AAC4093	2006-08-09	ZFMK	ZFMK-ICH-TIS-NB206	Natanebi	41.9331	41.8361	hand net	PC	-
Ex02G11	Romanogobio macropterus	BOLD:ADL3874	2012	FSJF	FSJF-DNA-752	Kura	41.7672	45.9242	hand net	PC	ZFMK-DNA-0100437556
C19-3	Rutilus lacustris	BOLD:ABZ3785	08-Aug-2006	RAS	ZFMK-ICH-TIS-C19Rutilus	Rioni	42.18	41.646	hand net	PC	-
C19-6	Rutilus lacustris	BOLD:AAA5492	08-Aug-2006	RAS	ZFMK-ICH-TIS-C19Rutilus	Rioni	42.18	41.646	hand net	PC	-
C19-8	Rutilus lacustris	BOLD:AAA5492	08-Aug-2006	RAS	ZFMK-ICH-TIS-C19Rutilus	Rioni	42.18	41.646	hand net	PC	-
Ex24G2	Sabanejewia aurata	BOLD:ADL3085	2006-08-06	ZFMK	ZFMK-ICH-TIS-NB179 & ZFMK ICH -103107-103120	Kura	42.0497	43.8456	hand net	PC	ZFMK-DNA-0100416157
Ex24G3	Sabanejewia aurata	BOLD:ADL3085	2006-08-06	ZFMK	ZFMK-ICH-TIS-NB179 & ZFMK ICH -103107-103120	Kura	42.0497	43.8456	hand net	PC	ZFMK-DNA-0100416156
Ex24G4	Sabanejewia aurata	BOLD:ADL3085	2006-08-06	ZFMK	ZFMK-ICH-TIS-NB179 & ZFMK ICH -103107-103120	Kura	42.0497	43.8456	hand net	PC	ZFMK-DNA-0100416327
Ex73A4	Sabanejewia aurata	BOLD:ADL3085	2006-08-03	ZFMK	ZFMK-ICH-TIS-C8-3	Kura	41.8631	45.8153	hand net	PC	-
WH03A5	Sabanejewia aurata	BOLD:ADL3085	2006-08-06	ZFMK	ZFMK-ICH-TIS-NB179 & ZFMK ICH -103107-103120	Kura	42.0497	43.8456	hand net	PC	-
8007870	Salmo caspius	BOLD:AAB3872	05-Jul-2019	ZFMK	ZFMK-ICH-106172	Kura	42.387	44.918	electro fishing	Georgia BioBlitz 2019	ZFMK-DNA-FD05085441
8007871	Salmo caspius	BOLD:AAB3872	05-Jul-2019	ZFMK	ZFMK-ICH-106173	Kura	42.387	44.918	electro fishing	Georgia BioBlitz 2019	ZFMK-DNA-FD05085449
8007872	Salmo caspius	BOLD:AAB3872	05-Jul-2019	ZFMK	ZFMK-ICH-106174	Kura	42.387	44.918	electro fishing	Georgia BioBlitz 2019	ZFMK-DNA-FD05085457
8007859	Salmo ciscaucasicus	BOLD:AAB3872	04-Jul-2019	ZFMK	ZFMK-ICH-106150	Terek	42.5612	44.5093	electro fishing	Georgia BioBlitz 2019	ZFMK-DNA-FD05085448
8007860	Salmo ciscaucasicus	BOLD:AAB3872	04-Jul-2019	ZFMK	ZFMK-ICH-106151	Terek	42.5612	44.5093	electro fishing	Georgia BioBlitz 2019	ZFMK-DNA-FD05085456
8007861	Salmo ciscaucasicus	BOLD:AAB3872	04-Jul-2019	ZFMK	ZFMK-ICH-106152	Terek	42.5612	44.5093	electro fishing	Georgia BioBlitz 2019	ZFMK-DNA-FD05085464
Ex73B3	Salmo labrax	BOLD:AAB3872	2007-08-02	ZFMK	ZFMK-ICH-TIS-K11-6	Kelasuri	43.0069	41.1264	hand net	PC	-
Ex73B4	Salmo labrax	BOLD:AAB3872	2007-08-02	ZFMK	ZFMK-ICH-TIS-K11-7	Kelasuri	43.0069	41.1264	hand net	PC	-
Ex24E11	Silurus glanis	BOLD:ACL1933	2006-08-04	ZFMK	ZFMK-ICH-TIS-NB166	Kura	41.355	45.0831	hand net	PC	ZFMK-DNA-0100416172
Ex24E12	Silurus glanis	BOLD:ACL1933	2006-08-04	ZFMK	ZFMK-ICH-TIS-NB166	Kura	41.355	45.0831	hand net	PC	ZFMK-DNA-0100416171
8005836	Squalius agdamicus	BOLD:ACL7240	08-Jul-2019	ZFMK	ZFMK-ICH-106214	Kakheti	41.867	45.81	electro fishing and frame net	Georgia BioBlitz 2019	ZFMK-DNA-FD05085685
8005837	Squalius agdamicus	BOLD:ACL7240	08-Jul-2019	ZFMK	ZFMK-ICH-106215	Kakheti	41.867	45.81	electro fishing and frame net	Georgia BioBlitz 2019	ZFMK-DNA-FD05085701
8007876	Squalius agdamicus	BOLD:ACL7240	07-Jul-2019	ZFMK	ZFMK-ICH-106187	Kura	41.972	44.755	electro fishing	Georgia BioBlitz 2019	ZFMK-DNA-FD05085394
8007877	Squalius agdamicus	BOLD:ACL7240	07-Jul-2019	ZFMK	ZFMK-ICH-106188	Kura	41.972	44.755	electro fishing	Georgia BioBlitz 2019	ZFMK-DNA-FD05085402
8007878	Squalius agdamicus	BOLD:ACL7240	07-Jul-2019	ZFMK	ZFMK-ICH-106189	Kura	41.972	44.755	electro fishing	Georgia BioBlitz 2019	ZFMK-DNA-FD05085410
Ex24E10	Squalius agdamicus	BOLD:ACL7240	2006-08-04	ZFMK	ZFMK-ICH-TIS-NB165	Kura	41.355	45.0831	hand net	PC	ZFMK-DNA-0100416398
Ex24E9	Squalius agdamicus	BOLD:ACL7240	2006-08-04	ZFMK	ZFMK-ICH-TIS-NB165	Kura	41.355	45.0831	hand net	PC	ZFMK-DNA-0100416416
WH02H11	Squalius agdamicus	BOLD:ACL7240	2006-08-04	ZFMK	ZFMK-ICH-TIS-NB165	Kura	41.355	45.0831	hand net	PC	-
Ex02B5	Squalius orientalis	BOLD:AAE3492	2007-07-30	FSJF	FSJF-DNA-259	Mokva	42.7078	41.485	hand net	PC	ZFMK-DNA-0100437619
Ex02B6	Squalius orientalis	BOLD:AAE3492	2007-07-30	FSJF	FSJF-DNA-259	Mokva	42.7078	41.485	hand net	PC	ZFMK-DNA-0100437620
Ex02B7	Squalius orientalis	BOLD:AAE3492	2007-07-29	FSJF	FSJF-DNA-260	Mokva	42.7078	41.485	hand net	PC	ZFMK-DNA-0100437621
Ex02B8	Squalius orientalis	BOLD:AAE3492	2007-07-29	FSJF	FSJF-DNA-260	Mokva	42.7078	41.485	hand net	PC	ZFMK-DNA-0100437622
Ex02B9	Squalius orientalis	BOLD:AAE3492	2007-07-29	FSJF	FSJF-DNA-260	Mokva	42.7078	41.485	hand net	PC	ZFMK-DNA-0100437623
Ex42C3	Squalius orientalis	BOLD:AAE3492	2006-08-09	FSJF	FSJF-DNA-1780	Natanebi	42.9331	41.8361	hand net	PC	-
Ex42C4	Squalius orientalis	BOLD:AAE3492	2006-08-09	FSJF	FSJF-DNA-1780	Natanebi	42.9331	41.8361	hand net	PC	-
Ex25B3	Squalius orientalis	BOLD:AAE3492	2006-08-09	ZFMK	ZFMK-ICH-TIS-NB203 & ZFMK ICH -103189-103201	Rioni	41.9331	41.8361	hand net	PC	-
Ex25B4	Squalius orientalis	BOLD:AAE3492	2006-08-09	ZFMK	ZFMK-ICH-TIS-NB203 & ZFMK ICH -103189-103201	Natanebi	41.933	41.836	hand net	PC	-
ZFMK-TIS-36006	Squalius orientalis	BOLD:AAE3492	21-Jul-2018	ZFMK	ZFMK-ICH-106074	Kintrishi	41.8033	41.7778	electro fishing	Georgia BioBlitz 2018	ZFMK-DNA-FC17902866
ZFMK-TIS-36007	Squalius orientalis	BOLD:AAE3492	21-Jul-2018	ZFMK	ZFMK-ICH-106075	Kintrishi	41.8033	41.7778	electro fishing	Georgia BioBlitz 2018	ZFMK-DNA-FC17902779
ZFMK-TIS-36036	Squalius orientalis	BOLD:AAE3492	21-Jul-2018	ZFMK	ZFMK-ICH-106104	Kintrishi	41.7991	41.848	electro fishing	Georgia BioBlitz 2018	ZFMK-DNA-FC17902844
ZFMK-TIS-36037	Squalius orientalis	BOLD:AAE3492	21-Jul-2018	ZFMK	ZFMK-ICH-106105	Kintrishi	41.7991	41.848	electro fishing	Georgia BioBlitz 2018	ZFMK-DNA-FC17902852
ZFMK-TIS-36191	Squalius orientalis	BOLD:AAE3492	19-Jul-2018	ZFMK	ZFMK-ICH-106259	Pichori	42.085	42.0246	hand net	Georgia BioBlitz 2018	ZFMK-DNA-FC17902871
Ex42D1	Squalius sp.	BOLD:ACL7240	2006-08-02	FSJF	FSJF-DNA-1785	Kura	41.5861	45.5986	hand net	PC	-
Ex42D2	Squalius sp.	-	2006-08-02	FSJF	FSJF-DNA-1785	Kura	41.5861	45.5986	hand net	PC	-
Ex72D1	Tinca tinca	BOLD:AAA7350	2007-07-31	ZFMK	ZFMK-ICH-TIS-K7-6	Galidzga	42.6881	41.5119	hand net	PC	-
Ex72D2	Tinca tinca	BOLD:AAA7350	2007-07-31	ZFMK	ZFMK-ICH-TIS-K7-6	Galidzga	42.6881	41.5119	hand net	PC	-
8007881	Vimba vimba	BOLD:AAD9149	07-Jul-2019	ZFMK	ZFMK-ICH-106195	Kura	41.972	44.755	electro fishing	Georgia BioBlitz 2019	ZFMK-DNA-FD05085434
Ex73A5	Vimba vimba	BOLD:AAD9149	2006-08-08	ZFMK	ZFMK-ICH-TIS-C19-2	Rioni	42.1806	41.6461	hand net	PC	-
WH03A2	Vimba vimba	BOLD:AAD9149	2006-08-05	ZFMK	ZFMK-ICH-TIS-NB171 & ZFMK ICH -103427-103430	Kura	41.9936	44.7603	hand net	PC	-
WH03A3	Vimba vimba	BOLD:AAD9149	2006-08-05	ZFMK	ZFMK-ICH-TIS-NB171 & ZFMK ICH -103427-103430	Kura	41.9936	44.7603	hand net	PC	-
ZFMK-TIS-36207	Vimba vimba	BOLD:AAD9149	21-Jul-2018	ZFMK	ZFMK-ICH-106275	Kintrishi	41.8033	41.7778	electro fishing	Georgia BioBlitz 2018	ZFMK-DNA-FC17902840
