# Supplementary material for: Towards retrieving the Promethean treasure: a first molecular assessment of the freshwater fish diversity of Georgia
Source: Biodivers Data J. 2020 Oct 23;8:e57862. doi: 10.3897/BDJ.8.e57862 (PMC7599205; doi:10.3897/BDJ.8.e57862)
Supplement: Supplementary material 2 — Epitashvili et al. Supplementary Table S2. [file bdj-08-e57862-s002.xlsx]

## Sheet: Supplementary Table S2
Epitashvili et al. Supplementary Table S2. Taxonomic structure and BOLD summary data of barcoded Georgian fishes with mean and maximum intraspecific distances and nearest neighbour statistics.
Order/Family	Species	DNA barcodes in BOLD (barcodes generated for this study)	BIN	Uncorrected p-distance		Nearest member species within dataset	Distance to NN species from dataset	Nearest BIN (Max Distance)	Nearest species in BOLD database
				mean	max
Cypriniformes
Cobitidae	Cobitis saniae	3 (0)	ADL2980	0	0	Cobitis satunini (EUFWF4953-19)	5.88	AAB2700 (1.06)	Cobitis faridpaki (GBMIN97114-17)
	Cobitis satunini	15 (15)	ADL5841	0.13	0.79	Cobitis saniae (SCCBO082-19)	5.88	ADL5842 (0.83)	Cobitis sp. (EUFWF2481-18)
	Sabanejewia aurata	5 (5)	ADL3085	0.25	0.62	Cobitis satunini (EUFWF3027-18)	17.18	ADL3084 (0.32)	Sabanejewia sp. (EUFWF878-18)
Cyprinidae	Acanthobrama microlepis	2 (2)	ADL5967	0.17	0.17	Vimba vimba (EUFWF5008-19)	4	AAD3588 (0.64)	Blicca bjoerkna (EUFWF1212-18)
	Alburnoides eichwaldii	12 (6)	ADK3170	0.88	1.72	Alburnoides fasciatus (EUFWF4944-19)	4.91	ADK6088 (0.87)	Alburnoides qanati (EUFWF2218-18)
	Alburnoides fasciatus	24 (17)	ADJ9477	0.25	0.62	Alburnoides eichwaldii (SCCBO057-19)	4.91	AAJ2545 (0.96)	Alburnoides gmelini (ANGBF18413-19)
	Alburnus filippii	4 (0)	AAB6906	0.23	0.3	Alburnus derjugini (EUFWF2139-18)	3.47	ACB3954 (1.5)	Alburnus arborella (EUFWF2091-18)
	Alburnus derjugini	10 (0)	AAB6908	0.66	2.46	Alburnus filippii (SCCBO055-19)	3.47	ADL7104 (0.83)	Alburnus doriae (ANGBF18470-19)
	Barbus cyri	12 (6)	AAD1959	0.26	0.48	Barbus rionicus (EUFWF3069-18)	1.09	ADL8422 (0)	Barbus miliaris (ANGBF18803-19)
	Barbus rionicus	23 (17)	AAD1959	0.18	0.98	Barbus cyri (EUFWF2154-18)	1.09	ADL8422 (0)	Barbus miliaris (ANGBF18803-19)
	Carassius gibelio	6 (3)	AAA7176	0.09	0.31	Barbus rionicus (EUFWF4959-19)	13.06	AEC5467 (N/A)	Carassius auratus (ANGBF4020-12)
	Chondrostoma colchicum	12 (12)	AAD7920	0.11	0.31	Chondrostoma cyri (RHCOI023-15)	0.7	ABY7793 (0.83)	Chondrostoma vardarense (GFFB321-18)
	Chondrostoma cyri	4 (4)	AAD7920	1.04	2.34	Chondrostoma colchicum (EUFWF3045-18)	0.7	ABY7793 (0.83)	Chondrostoma vardarense (GFFB321-18)
	Gobio artvinicus	3 (3)	ADF3232	0.1	0.15	Gobio caucasicus (SCCBO040-19)	0	ADM1515 (0.16)	Gobio sp. Arges (EUFWF3335-18)
	Gobio caucasicus	23 (1)	ADF3232	0.11	0.49	Gobio artvinicus (EUFWF4984-19)	0	ADM1515 (0.16)	Gobio sp. Arges (EUFWF3335-18)
	Leucaspius delineatus	2 (2)	ACL6573	1.26	1.26	Alburnus filippii (SCCBO055-19)	6.42	AAB6907 (0.96)	Leucaspius delineatus (EUFWF3452-18)
	Luciobarbus capito	7 (0)	ADC9652	0.13	0.31	Capoeta capoeta (SCCBO069-19)	5.1	ACL7482 (2.51)	Luciobarbus barbulus (EUFWF3547-18)
	Luciobarbus mursa	8 (4)	ADK8086	0	0	Capoeta capoeta (SCCBO080-19)	5.38	ACL7679 (0.17)	Luciobarbus albanicus (FFMBH738-14)
	Petroleuciscus borysthenicus	2 (2)	ACB4660	0	0	Squalius agdamicus (SCCBO086-19)	6.7	ADM6429 (0)	Petroleuciscus sp. (EUFWF4346-18)
	Phoxinus colchicus	9 (9)	ACU3022	0.66	2.03	Alburnus derjugini (EUFWF4987-19)	14.66	AAN2892 (1.28)	Phoxinus sp. (EUFWF4816-18)
	Pseudorasbora parva	2 (0)	AAD0138	0	0	Alburnoides eichwaldii (EUFWF2150-18)	16.87	ADU0323 (1.77)	Pseudorasbora parva (ANGBF3972-12)
	Rhodeus colchicus	6 (6)	AAC4093	0.98	1.89	Squalius orientalis (EUFWF1044-18)	16.69	ADW2827 (N/A)	Rhodeus (ANGBF14310-19)
	Romanogobio macropterus	1 (1)	ADL3874	N/A	N/A	Gobio caucasicus (SCCBO037-19)	12.67	AAX8804 (1.66)	Romanogobio albipinnatus (EUFWF816-18)
	Rutilus lacustris	3 (3)	AAA5492	1.46	2.03	Chondrostoma colchicum (EUFWF4985-19)	6.6	AAA5492 (1.44)	Rutilus rutilus aralensis (EEFF315-09)
	Squalius agdamicus	8 (3)	ACL7240	0.09	0.16	Squalius sp. (EUFWF1046-18)	0.62	AAD8346 (2.63)	Squalius svallize (EUFWF1101-18)
	Squalius orientalis	14 (14)	AAE3492	0.04	0.15	Squalius agdamicus (SCCBO086-19)	4.59	ACL7240 (1.77)	Squalius Lepidus (EUFWF1003-18)
	Squalius sp.	2 (2)	ACL7240	0.17	0.17	Squalius agdamicus (EUFWF1382-18)	0.62	AAD8346 (2.63)	Squalius svallize (EUFWF1101-18)
	Tinca tinca	2 (2)	AAA7350	0	0	Alburnoides eichwaldii (EUFWF2157-18)	13.46	AAF6633 (4.38)	Hypophthalmichthys molitrix (GBGCA10598-15)
	Vimba vimba	5 (4)	AAD9149	0.28	0.62	Acanthobrama microlepis (EUFWF2156-18)	4	AAD3588 (0.64)	Blicca bjoerkna (ANGBF8159-12)
Nemacheilidae	Oxynoemacheilus brandtii	13 (8)	ADL9692	0.22	0.77	Oxynoemacheilus sp. (EUFWF4028-18)	6.98	ADM1646 (0.16)	Oxynoemacheilus sp. (EUFWF3974-18)
	Oxynoemacheilus sp.	9 (9)	ADM2519	0.62	2.18	Oxynoemacheilus brandtii (EUFWF3774-18)	6.98	ADM1646 (0.16)	Oxynoemacheilus sp. (EUFWF3974-18)
Cyprinodontiformes
Poeciliidae	Gambusia holbrooki	4 (4)	AAC2757	0.15	0.31	Rhinogobius lindbergi (SCCBO047-19)	22.34	AAC2756 (1.09)	Gambusia marshi (MFIV120-10)
Esociformes
Esocidae	Esox lucius	2 (2)	AAA5988	0	0	Neogobius fluviatilis (EUFWF4950-19)	21.72	ACM2729 (0.31)	Esox aquitanicus (FRBRO056-14)
Gobiiformes
Gobiidae	Knipowitschia caucasica	2 (2)	AAE8660	0	0	Rhinogobius lindbergi (SCCBO043-19)	21.02	ACL6998 (0.82)	Knipowitschia caucasica (ANGBF36360-19)
	Neogobius fluviatilis	5 (5)	ABA9510	0.97	2.19	Neogobius melanostomus (EUFWF4938-19)	9.01	ADM3068 (0.32)	Neogobius caspius (EUFWF3664-18)
	Neogobius melanostomus	4 (4)	AAC0218	0.33	0.46	Neogobius fluviatilis (EUFWF4950-19)	9.01	ADM3068 (0.32)	Neogobius caspius (EUFWF3664-18)
	Ponticola cyrius	6 (3)	ADM6642	0.08	0.16	Ponticola constructor (EUFWF743-18)	4.3	ADL3063 (0)	Ponticola sp. (EUFWF767-18)
	Proterorhinus nasalis	11 (11)	ABY5094	1.31	2.36	Ponticola cyrius (EUFWF4768-18)	15	ABY5094 (0.8)	Proterorhinus sp. (EEFF218-09)
Oxudercidae	Rhinogobius lindbergi	9 (4)	ACB4145	0	0	Leucaspius delineates (EUFWF3439-18)	20.12	ACB4146 (1.28)	Rhinogobius kurodai (GBGCA11836-15)
Perciformes
Percidae	Gymnocephalus cernua	4 (4)	AAB0392	0	0	Perca fluviatilis (EUFWF4771-18)	15.81	ACE9709 (0.8)	Gymnocephalus cernua (ANGBF23724-19)
	Perca fluviatilis	2 (2)	AAB0356	0	0	Gymnocephalus cernua (EUFWF3363-18)	15.81	AAI3957 (0.8)	Perca schrenkii (GBGCA12224-15)
Petromyzontiformes
Petromyzontidae	Lampetra ninae	14 (14)	ABY6638	0.24	0.78­	Carassius gibelio (EUFWF3043-18)	24.15	ACE9732 (0.61)	Lampetra sp. (FFMBH2539-14)
Salmoniformes
Salmonidae	Oncorhynchus mykiss	1 (1)	AAA1627	N/A	N/A	Salmo labrax (EUFWF1376-18)	14.26	ADL5322 (N/A)	Oncorhynchus mykiss (GBMIN129110-17)
	Salmo caspius	3 (0)	AAB3872	0.1	0.15	Salmo ciscaucasicus (SCCBO048-19)	0	AAA3435 (1.29)	FSHN665-20
	Salmo ciscaucasicus	3 (0)	AAB3872	0	0	Salmo caspius (SCCBO060-19)	0	AAA3435 (1.29)	FSHN665-20
	Salmo labrax	2 (2)	AAB3872	0.31	0.31	Salmo caspius (SCCBO060-19)	0.15	AAA3435 (1.29)	FSHN665-20
Scorpaeniformes
Gasterosteidae	Gasterosteus aculeatus	3 (3)	AAA8488	0.51	0.77	Neogobius fluviatilis (EUFWF3678-18)	17.82	AAA8489 (0.64)	Gasterosteus aculeatus (GBGC0384-06)
Siluriformes
Siluridae	Silurus glanis	2 (2)	ACL1933	0	0	Gobio caucasicus (SCCBO037-19)	18.97	ADM5076 (0.59)	Silurus triostegus (EUFWF4298-18)
